# Supplementary material
Source: Springer Nature journal article supplement (https://www.springermedizin.de/resource/supplementary/13063_2013_2023_MOESM4_ESM.pdf/9621172)
Supplement: MOESM4 [file 9621172]

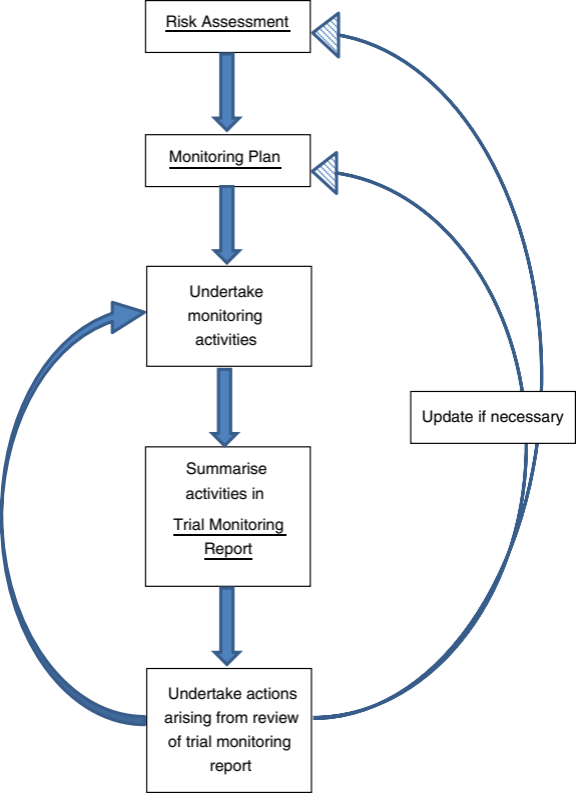

Risk Assessment

Monitoring Plan

Undertake  
monitoring  
activities

Summarise  
activities in  
Trial Monitoring  
Report

Undertake actions  
arising from review  
of trial monitoring  
report

Update if necessary
